# Supplementary material
Source: PubMed Central journal article supplement (PMC3855636)

| Chart Number | CrataBL (20ug/ml) Slide#15205 rRequest#2547 Alexa488 3/6/2012 YL                                                                                                                                                  |
|--------------|-------------------------------------------------------------------------------------------------------------------------------------------------------------------------------------------------------------------|
| 22           | 6S(3S)Galb1-4(6S)GlcNAcb-Sp0                                                                                                                                                                                      |
| 445          | (6S)Galb1-3(6S)GlcNAc-Sp0                                                                                                                                                                                         |
| 502          | Fuca1-2(6S)Galb1-3(6S)GlcNAcb-Sp0                                                                                                                                                                                 |
| 35           | (3S)Galb1-4(6S)GlcNAcb-Sp8                                                                                                                                                                                        |
| 512          | (6S)(4S)GalNAcb1-4GlcNAc-Sp8                                                                                                                                                                                      |
| 298          | (6S)Galb1-4(6S)GlcNAcb-Sp0                                                                                                                                                                                        |
| 27           | (3S)Galb1-4(6S)Glc-Sp8                                                                                                                                                                                            |
| 34           | (3S)Galb1-4(6S)GlcNAcb-Sp0                                                                                                                                                                                        |
| 23           | 6S(3S)Galb1-4GlcNAcb-Sp0                                                                                                                                                                                          |
| 45           | (6S)Galb1-4(6S)Glc-Sp8                                                                                                                                                                                            |
| 39           | (6S)(4S)Galb1-4GlcNAcb-Sp0                                                                                                                                                                                        |
| 26           | (3S)Galb1-4(6S)Glc-Sp0                                                                                                                                                                                            |
| 542          | Galb1-4GlcNAcb1-3Galb1-4GlcNAcb1-2Mana1-6(Galb1-4GlcNAcb1-3Galb1-4GlcNAcb1-2Mana1-3)Manb1-4GlcNAcb1-4GlcNAcb-Sp12                                                                                                 |
| 548          | Galb1-4GlcNAcb1-3Galb1-4GlcNAcb1-3Galb1-4GlcNAcb1-2Mana1-6(Galb1-4GlcNAcb1-3Galb1-4GlcNAcb1-3Galb1-4GlcNAcb1-2Mana1-3)Manb1-4GlcNAcb1-4GlcNAcb-Sp12                                                               |
| 220          | (3S)Galb1-4(Fuca1-3)(6S)GlcNAcb-Sp8                                                                                                                                                                               |
| 297          | 4S(3S)Galb1-4GlcNAcb-Sp0                                                                                                                                                                                          |
| 252          | Neu5Aca2-3Galb1-4(6S)GlcNAcb-Sp8                                                                                                                                                                                  |
| 47           | (6S)GlcNAcb-Sp8                                                                                                                                                                                                   |
| 514          | (3S)GalNAcb1-4(3S)GlcNAc-Sp8                                                                                                                                                                                      |
| 243          | Neu5Aca2-3Galb1-3(6S)GalNAca-Sp8                                                                                                                                                                                  |
| 481          | Neu5Aca2-6Galb1-4GlcNAcb1-6GalNAca-Sp14                                                                                                                                                                           |
| 202          | GlcAa-Sp8                                                                                                                                                                                                         |
| 517          | (4S)GalNAcb-Sp10                                                                                                                                                                                                  |
| 546          | GlcNAcb1-3Galb1-4GlcNAcb1-3Galb1-4GlcNAcb1-2Mana1-6(GlcNAcb1-3Galb1-4GlcNAcb1-3Galb1-4GlcNAcb1-2Mana1-3)Manb1-4GlcNAcb1-4GlcNAcb-Sp12                                                                             |
| 156          | Galb1-4(6S)Glc-Sp0                                                                                                                                                                                                |
| 203          | GlcAb-Sp8                                                                                                                                                                                                         |
| 253          | Neu5Aca2-3Galb1-4(Fuca1-3)(6S)GlcNAcb-Sp8                                                                                                                                                                         |
| 607          | Neu5Aca2-6Galb1-4GlcNAcb1-3Galb1-4GlcNAcb1-3Galb1-4GlcNAcb1-2Mana1-6(Neu5Aca2-6Galb1-4GlcNAcb1-3Galb1-4GlcNAcb1-3Galb1-4GlcNAcb1-2Mana1-3)Manb1-4GlcNAcb1-4GlcNAcb-Sp12                                           |
| 223          | Fuca1-2(6S)Galb1-4(6S)Glc-Sp0                                                                                                                                                                                     |
| 608          | Neu5Aca2-3Galb1-4GlcNAcb1-3Galb1-4GlcNAcb1-3Galb1-4GlcNAcb1-2Mana1-6(Neu5Aca2-3Galb1-4GlcNAcb1-3Galb1-4GlcNAcb1-3Galb1-4GlcNAcb1-2Mana1-3)Manb1-4GlcNAcb1-4GlcNAcb-Sp12                                           |
| 343          | GlcNAca1-4Galb1-4GlcNAcb1-3Galb1-4(Fuca1-3)GlcNAcb1-3Galb1-4(Fuca1-3)GlcNAcb-Sp0                                                                                                                                  |
| 419          | GalNAca1-3(Fuca1-2)Galb1-4(Fuca1-3)GlcNAcb1-3GalNAc-Sp14                                                                                                                                                          |
| 157          | Galb1-4(6S)Glc-Sp8                                                                                                                                                                                                |
| 479          | Neu5Aca2-3Galb1-4GlcNAcb1-2Mana-Sp0                                                                                                                                                                               |
| 454          | GalNAcb1-4Galb1-4Glc-Sp0                                                                                                                                                                                          |
| 205          | GlcAb1-6Galb-Sp8                                                                                                                                                                                                  |
| 204          | GlcAb1-3Galb-Sp8                                                                                                                                                                                                  |
| 299          | (6P)Glc-Sp10                                                                                                                                                                                                      |
| 268          | Neu5Aca2-6Galb1-4(6S)GlcNAcb-Sp8                                                                                                                                                                                  |
| 239          | Neu5Aca2-3Galb1-3(6S)GlcNAc-Sp8                                                                                                                                                                                   |
| 559          | GlcNAcb1-3Galb1-4GlcNAcb1-6(GlcNAcb1-3Galb1-4GlcNAcb1-2)Mana1-6(GlcNAcb1-3Galb1-4GlcNAcb1-2Mana1-3)Manb1-4GlcNAcb1-4GlcNAcb-Sp24                                                                                  |
| 444          | (6S)Galb1-3GlcNAcb-Sp0                                                                                                                                                                                            |
| 38           | (3S)Galb-Sp8                                                                                                                                                                                                      |
| 560          | Galb1-4GlcNAcb1-3Galb1-4GlcNAcb1-6(Galb1-4GlcNAcb1-3Galb1-4GlcNAcb1-2)Mana1-6(Galb1-4GlcNAcb1-3Galb1-4GlcNAcb1-2Mana1-3)Manb1-4GlcNAcb1-4GlcNAc-Sp24                                                              |
| 591          | Galb1-4GlcNAcb1-3Galb1-4GlcNAcb1-6(Galb1-3)GalNAca-Sp14                                                                                                                                                           |
| 571          | (3S)GlcAb1-3Galb1-4GlcNAcb1-2Mana-Sp0                                                                                                                                                                             |
| 276          | Neu5Aca2-8Neu5Aca-Sp8                                                                                                                                                                                             |
| 573          | Galb1-3GlcNAcb1-3Galb1-4GlcNAcb1-6(Galb1-3GlcNAcb1-3Galb1-4GlcNAcb1-2)Mana1-6(Galb1-3GlcNAcb1-3Galb1-4GlcNAcb1-2Mana1-3)Manb1-4GlcNAcb1-4(Fuca1-6)GlcNAcb-Sp24                                                    |
| 230          | Neu5Aca2-8Neu5Aca2-8Neu5Aca-Sp8                                                                                                                                                                                   |
| 511          | Galb1-3(6S)GlcNAcb-Sp8                                                                                                                                                                                            |
| 592          | Galb1-4GlcNAcb1-3Galb1-4GlcNAcb1-6(Galb1-4GlcNAcb1-3Galb1-4GlcNAcb1-3)GalNAca-Sp14                                                                                                                                |
| 24           | (3S)Galb1-4(Fuca1-3)(6S)Glc-Sp0                                                                                                                                                                                   |
| 345          | GlcNAca1-4Galb1-3GalNAc-Sp14                                                                                                                                                                                      |
| 530          | Neu5Aca2-3Galb1-3GlcNAcb1-4Galb1-4Glc-Sp0                                                                                                                                                                         |
| 263          | Fuca1-2Galb1-4(6S)Glc-Sp0                                                                                                                                                                                         |
| 10           | Neu5Aca-Sp11                                                                                                                                                                                                      |
| 43           | (6S)Galb1-4Glc-Sp8                                                                                                                                                                                                |
| 201          | G-ol-Sp8                                                                                                                                                                                                          |
| 48           | Neu5,9Ac,a-Sp8                                                                                                                                                                                                    |
| 81           | Fuca1-4GlcNAcb-Sp8                                                                                                                                                                                                |
| 518          | Galb1-4(6P)GlcNAcb-Sp0                                                                                                                                                                                            |
| 133          | Galb1-4GlcNAcb1-6GalNAc-Sp14                                                                                                                                                                                      |
| 572          | Galb1-3GlcNAcb1-3Galb1-4GlcNAcb1-3Galb1-4GlcNAcb1-6(Galb1-3GlcNAcb1-3Galb1-4GlcNAcb1-3Galb1-4GlcNAcb1-2)Mana1-6(Galb1-3GlcNAcb1-3Galb1-4GlcNAcb1-3Galb1-4GlcNAcb1-2Mana1-3)Manb1-4GlcNAcb1-4(Fuca1-6)GlcNAcb-Sp24 |



|     |                                                                                                                                                                                                                                                                                                     |
|-----|-----------------------------------------------------------------------------------------------------------------------------------------------------------------------------------------------------------------------------------------------------------------------------------------------------|
| 604 | Neu5Aca2-3Galb1-4GlcNAcb1-3Galb1-4GlcNAcb1-2Mana1-6(Neu5Aca2-3Galb1-4GlcNAcb1-3Galb1-4GlcNAcb1-2Mana1-3)Manb1-4GlcNAcb1-4GlcNAcb-Sp12                                                                                                                                                               |
| 567 | GlcNAcb1-3Galb1-3GalNAc-Sp14                                                                                                                                                                                                                                                                        |
| 218 | Manb1-4GlcNAcb-Sp0                                                                                                                                                                                                                                                                                  |
| 123 | Gala1-4Galb1-4Glc-Sp0                                                                                                                                                                                                                                                                               |
| 468 | Gala1-3(Fuca1-2)Galb1-3GalNAc-Sp8                                                                                                                                                                                                                                                                   |
| 119 | Gala1-3Galb-Sp8                                                                                                                                                                                                                                                                                     |
| 570 | (3S)GlcAb1-3Galb1-4GlcNAcb1-3Galb1-4Glc-Sp0                                                                                                                                                                                                                                                         |
| 600 | Galb1-4GlcNAcb1-3Galb1-3GalNAc-Sp14                                                                                                                                                                                                                                                                 |
| 347 | Mana1-6(Neu5Aca2-6Galb1-4GlcNAcb1-2Mana1-3)Manb1-4GlcNAcb1-4GlcNAc-Sp12                                                                                                                                                                                                                             |
| 59  | Fuca1-2Galb1-3GalNAcb1-3Gala-Sp9                                                                                                                                                                                                                                                                    |
| 326 | Neu5Aca2-3Galb1-4GlcNAcb1-2Mana1-6(Neu5Aca2-3Galb1-4GlcNAcb1-2Mana1-3)Manb1-4GlcNAcb1-4GlcNAcb-Sp12                                                                                                                                                                                                 |
| 598 | Neu5Aca2-6Galb1-4GlcNAcb1-3Galb1-4GlcNAcb1-3GalNAc-Sp14                                                                                                                                                                                                                                             |
| 585 | Galb1-4GlcNAcb1-3Galb1-4GlcNAcb1-3Galb1-4GlcNAcb1-6(Galb1-4GlcNAcb1-3Galb1-4GlcNAcb1-3Galb1-4GlcNAcb1-2)Mana1-6(Galb1-4GlcNAcb1-3Galb1-4GlcNAcb1-3Galb1-4GlcNAcb1-2Mana1-3)Manb1-4GlcNAcb1-4(Fuca1-6)GlcNAcb-Sp24                                                                                   |
| 226 | GalNAcb1-4(Neu5Aca2-8Neu5Aca2-8Neu5Aca2-8Neu5Aca2-3)Galb1-4Glc-Sp0                                                                                                                                                                                                                                  |
| 529 | GalNAcb1-4GlcNAcb1-2Mana-Sp0                                                                                                                                                                                                                                                                        |
| 228 | Neu5Aca2-8Neu5Aca2-8Neu5Aca2-3Galb1-4Glc-Sp0                                                                                                                                                                                                                                                        |
| 141 | Galb1-3GalNAc-Sp14                                                                                                                                                                                                                                                                                  |
| 44  | (6S)Galb1-4GlcNAcb-Sp8                                                                                                                                                                                                                                                                              |
| 588 | GlcNAcb1-3Galb1-4GlcNAcb1-3Galb1-4GlcNAcb1-3Galb1-4GlcNAcb1-3Galb1-4GlcNAcb1-6(GlcNAcb1-3Galb1-4GlcNAcb1-3Galb1-4GlcNAcb1-3Galb1-4GlcNAcb1-3Galb1-4GlcNAcb1-2)Mana1-6(GlcNAcb1-3Galb1-4GlcNAcb1-3Galb1-4GlcNAcb1-3Galb1-4GlcNAcb1-3Galb1-4GlcNAcb1-2)Mana1-3)Manb1-4GlcNAcb1-4(Fuca1-6)GlcNAcb-Sp24 |
| 72  | Fuca1-2Galb1-4(Fuca1-3)GlcNAcb-Sp0                                                                                                                                                                                                                                                                  |
| 241 | Neu5Aca2-3Galb1-3(Fuca1-4)GlcNAcb1-3Galb1-4(Fuca1-3)GlcNAcb-Sp0                                                                                                                                                                                                                                     |
| 478 | Neu5Aca2-6Galb1-4GlcNAcb1-6(Galb1-3GlcNAcb1-3)Galb1-4Glc-Sp21                                                                                                                                                                                                                                       |
| 168 | Galb1-4GlcNAcb1-6(Galb1-3)GalNAc-Sp14                                                                                                                                                                                                                                                               |
| 323 | Neu5Aca2-8Neu5Aca2-8Neu5Acb-Sp8                                                                                                                                                                                                                                                                     |
| 324 | Neu5Gcb2-6Galb1-4GlcNAc-Sp8                                                                                                                                                                                                                                                                         |
| 273 | Neu5Aca2-6Galb1-4Glc-Sp0                                                                                                                                                                                                                                                                            |
| 599 | GlcNAcb1-3Galb1-4GlcNAcb1-3Galb1-4GlcNAcb1-3GalNAc-Sp14                                                                                                                                                                                                                                             |
| 477 | Galb1-3GlcNAcb1-2Mana1-6(GlcNAcb1-4)(Galb1-3GlcNAcb1-2Mana1-3)Manb1-4GlcNAcb1-4GlcNAcb-Sp21                                                                                                                                                                                                         |
| 7   | Fuca-Sp9                                                                                                                                                                                                                                                                                            |
| 190 | GlcNAcb1-4GlcNAcb1-4GlcNAcb1-4GlcNAcb1-4GlcNAcb1-4GlcNAcb1-Sp8                                                                                                                                                                                                                                      |
| 264 | Neu5Aca2-3Galb1-4Glc-Sp0                                                                                                                                                                                                                                                                            |
| 586 | GlcNAcb1-3Galb1-4GlcNAcb1-3Galb1-4GlcNAcb1-3Galb1-4GlcNAcb1-6(GlcNAcb1-3Galb1-4GlcNAcb1-3Galb1-4GlcNAcb1-3Galb1-4GlcNAcb1-2)Mana1-6(GlcNAcb1-3Galb1-4GlcNAcb1-3Galb1-4GlcNAcb1-3Galb1-4GlcNAcb1-2)Mana1-3)Manb1-4GlcNAcb1-4(Fuca1-6)GlcNAcb-Sp24                                                    |
| 67  | Fuca1-2Galb1-3GlcNAcb1-3Galb1-4Glc-Sp10                                                                                                                                                                                                                                                             |
| 337 | GalNAc1-3(Fuca1-2)Galb1-4GlcNAcb1-3Galb1-4GlcNAcb1-3Galb1-4GlcNAcb-Sp0                                                                                                                                                                                                                              |
| 301 | Galb1-3Galb1-4GlcNAcb-Sp8                                                                                                                                                                                                                                                                           |
| 541 | GlcNAcb1-3Galb1-4GlcNAcb1-2Mana1-6(GlcNAcb1-3Galb1-4GlcNAcb1-2Mana1-3)Manb1-4GlcNAcb1-4GlcNAcb-Sp25                                                                                                                                                                                                 |
| 242 | Neu5Aca2-3Galb1-4(Neu5Aca2-3Galb1-3)GlcNAcb-Sp8                                                                                                                                                                                                                                                     |
| 471 | Glc1-4Glc1-4Glc1-4Glc-Sp10                                                                                                                                                                                                                                                                          |
| 356 | (6S)GlcNAcb1-3Galb1-4GlcNAcb-Sp0                                                                                                                                                                                                                                                                    |
| 321 | GlcNAcb1-2Mana1-6(Neu5Aca2-6Galb1-4GlcNAcb1-2Mana1-3)Manb1-4GlcNAcb1-4GlcNAcb-Sp12                                                                                                                                                                                                                  |
| 474 | Fuca1-2Galb1-3(Fuca1-4)GlcNAcb1-2Mana1-6(Fuca1-2Galb1-3(Fuca1-4)GlcNAcb1-2Mana1-3)Manb1-4GlcNAcb1-4(Fuca1-6)GlcNAcb1-4(Fuca1-6)GlcNAcb-Sp19                                                                                                                                                         |
| 418 | Gala1-3(Fuca1-2)Galb1-4(Fuca1-3)GlcNAcb1-3GalNAc-Sp14                                                                                                                                                                                                                                               |
| 196 | Glc1-4Glc-Sp8                                                                                                                                                                                                                                                                                       |
| 353 | GlcNAcb1-2Mana1-6(GlcNAcb1-2Mana1-3)Manb1-4GlcNAcb1-4(Fuca1-6)GlcNAcb-Sp22                                                                                                                                                                                                                          |
| 497 | Galb1-4(Fuca1-3)GlcNAcb1-2Mana-Sp0                                                                                                                                                                                                                                                                  |
| 463 | Neu5Aca2-3Galb1-4GlcNAcb1-6(Neu5Aca2-3Galb1-4GlcNAcb1-2)Mana1-6(GlcNAcb1-4)(Neu5Aca2-3Galb1-4GlcNAcb1-4)Neu5Aca2-3Galb1-4GlcNAcb1-2)Mana1-3)Manb1-4GlcNAcb1-4GlcNAcb-Sp21                                                                                                                           |
| 314 | Mana1-6Manb-Sp10                                                                                                                                                                                                                                                                                    |
| 101 | Gala1-2Galb-Sp8                                                                                                                                                                                                                                                                                     |
| 146 | Galb1-3GalNAcb1-4Galb1-4Glc-Sp8                                                                                                                                                                                                                                                                     |
| 395 | Gala1-3Galb1-3GlcNAcb1-2Mana1-6(Gala1-3Galb1-3GlcNAcb1-2Mana1-3)Manb1-4GlcNAcb1-4GlcNAc-Sp19                                                                                                                                                                                                        |
| 93  | GalNAc1-3Galb-Sp8                                                                                                                                                                                                                                                                                   |
| 315 | Mana1-6(Mana1-3)Mana1-6(Mana1-3)Manb-Sp10                                                                                                                                                                                                                                                           |
| 332 | Neu5Aca2-3Galb1-3(Fuca1-4)GlcNAcb1-3Galb1-3(Fuca1-4)GlcNAcb-Sp0                                                                                                                                                                                                                                     |
| 596 | GlcNAcb1-3Galb1-4GlcNAcb1-6(GlcNAcb1-3Galb1-4GlcNAcb1-3)GalNAc-Sp14                                                                                                                                                                                                                                 |
| 31  | (3S)Galb1-3GlcNAcb-Sp8                                                                                                                                                                                                                                                                              |
| 587 | Galb1-4GlcNAcb1-3Galb1-4GlcNAcb1-3Galb1-4GlcNAcb1-6(Galb1-4GlcNAcb1-3Galb1-4GlcNAcb1-3Galb1-4GlcNAcb1-3Galb1-4GlcNAcb1-2)Mana1-6(Galb1-4GlcNAcb1-3Galb1-4GlcNAcb1-3Galb1-4GlcNAcb1-3Galb1-4GlcNAcb1-2)Mana1-3)Manb1-4GlcNAcb1-4(Fuca1-6)GlcNAcb-Sp24                                                |
| 597 | Neu5Aca2-3Galb1-4GlcNAcb1-3Galb1-4GlcNAcb1-6(Neu5Aca2-3Galb1-4GlcNAcb1-3Galb1-4GlcNAcb1-3)GalNAc-Sp14                                                                                                                                                                                               |
| 110 | Gala1-4(Gala1-3)Galb1-4GlcNAcb-Sp8                                                                                                                                                                                                                                                                  |
| 250 | Neu5Aca2-3Galb1-3GlcNAcb-Sp0                                                                                                                                                                                                                                                                        |
| 372 | Gala1-3(Fuca1-2)Galb1-4GlcNAcb1-2Mana1-6(Gala1-3(Fuca1-2)Galb1-4GlcNAcb1-2Mana1-3)Manb1-4GlcNAcb1-4GlcNAcb-Sp20                                                                                                                                                                                     |
| 40  | (4S)Galb1-4GlcNAcb-Sp8                                                                                                                                                                                                                                                                              |
| 451 | Gala1-3(Fuca1-2)Galb1-4GlcNAcb1-6(Gala1-3(Fuca1-2)Galb1-4GlcNAcb1-3)GalNAc-Sp14                                                                                                                                                                                                                     |

|     |                                                                                                                                                                                                                                                                            |
|-----|----------------------------------------------------------------------------------------------------------------------------------------------------------------------------------------------------------------------------------------------------------------------------|
| 582 | Galb1-4GlcNAcb1-3Galb1-4GlcNAcb1-3Galb1-4GlcNAcb1-3Galb1-4GlcNAcb1-3Galb1-4GlcNAcb1-2Mana1-6(Galb1-4GlcNAcb1-3Galb1-4GlcNAcb1-3Galb1-4GlcNAcb1-3Galb1-4GlcNAcb1-3Galb1-4GlcNAcb1-2Mana1-3)Manb1-4GlcNAcb1-4(Fuca1-6)GlcNAcb-Sp19                                           |
| 100 | GalNAcb1-4GlcNAcb-Sp8                                                                                                                                                                                                                                                      |
| 28  | (3S)Galb1-3(Fuca1-4)GlcNAcb-Sp8                                                                                                                                                                                                                                            |
| 313 | MurNAcb1-4GlcNAcb-Sp10                                                                                                                                                                                                                                                     |
| 121 | Gala1-4Galb1-4GlcNAcb-Sp0                                                                                                                                                                                                                                                  |
| 513 | (6S)GalNAcb1-4GlcNAcb-Sp8                                                                                                                                                                                                                                                  |
| 95  | GalNAcb1-3GalNAca-Sp8                                                                                                                                                                                                                                                      |
| 480 | Neu5Aca2-3Galb1-4GlcNAcb1-6GalNAca-Sp14                                                                                                                                                                                                                                    |
| 5   | GalNAca-Sp15                                                                                                                                                                                                                                                               |
| 20  | Galb1-4GlcNAcb1-6(Galb1-4GlcNAcb1-3)GalNAcb-Sp14                                                                                                                                                                                                                           |
| 122 | Gala1-4Galb1-4GlcNAcb-Sp8                                                                                                                                                                                                                                                  |
| 583 | Galb1-4GlcNAcb1-3Galb1-4GlcNAcb1-6(Galb1-4GlcNAcb1-3Galb1-4GlcNAcb1-2)Mana1-6(Galb1-4GlcNAcb1-3Galb1-4GlcNAcb1-2Mana1-3)Manb1-4GlcNAcb1-4(Fuca1-6)GlcNAcb-Sp24                                                                                                             |
| 118 | Gala1-3Galb1-4Glc-Sp10                                                                                                                                                                                                                                                     |
| 246 | Neu5Aca2-3Galb-Sp8                                                                                                                                                                                                                                                         |
| 222 | Fuca1-2Galb1-4(6S)GlcNAcb-Sp8                                                                                                                                                                                                                                              |
| 580 | Galb1-4GlcNAcb1-3Galb1-4GlcNAcb1-3Galb1-4GlcNAcb1-3Galb1-4GlcNAcb1-2Mana1-6(Galb1-4GlcNAcb1-3Galb1-4GlcNAcb1-3Galb1-4GlcNAcb1-2Mana1-3)Manb1-4GlcNAcb1-4(Fuca1-6)GlcNAcb-Sp24                                                                                              |
| 420 | Galb1-4(Fuca1-3)GlcNAcb1-2Mana1-6(Galb1-4(Fuca1-3)GlcNAcb1-2Mana1-3)Manb1-4GlcNAcb1-4(Fuca1-6)GlcNAcb-Sp22                                                                                                                                                                 |
| 521 | Neu5Aca2-6Galb1-4GlcNAcb1-2Man-Sp0                                                                                                                                                                                                                                         |
| 154 | Galb1-4(Fuca1-3)GlcNAcb1-3Galb1-4(Fuca1-3)GlcNAcb-Sp0                                                                                                                                                                                                                      |
| 211 | Mana1-6(Mana1-2Mana1-3)Mana1-6(Mana1-2Mana1-3)Manb1-4GlcNAcb1-4GlcNAcb-Sp12                                                                                                                                                                                                |
| 469 | Gala1-3(Fuca1-2)Galb1-3GalNAcb-Sp8                                                                                                                                                                                                                                         |
| 378 | Neu5Aca2-6Galb1-4GlcNAcb1-3GalNAcb-Sp14                                                                                                                                                                                                                                    |
| 237 | Neu5Aca2-3GalNAca-Sp8                                                                                                                                                                                                                                                      |
| 132 | Galb1-4GlcNAcb1-6GalNAca-Sp8                                                                                                                                                                                                                                               |
| 396 | Gala1-3Galb1-3(Fuca1-4)GlcNAcb1-2Mana1-6(Gala1-3Galb1-3(Fuca1-4)GlcNAcb1-2Mana1-3)Manb1-4GlcNAcb1-4GlcNAcb-Sp19                                                                                                                                                            |
| 379 | Neu5Aca2-3Galb1-4(Fuca1-3)GlcNAcb1-3GalNAca-Sp14                                                                                                                                                                                                                           |
| 125 | Gala1-6Glc-Sp8                                                                                                                                                                                                                                                             |
| 109 | Gala1-3(Fuca1-2)Galb-Sp18                                                                                                                                                                                                                                                  |
| 579 | GlcNAcb1-3Galb1-4GlcNAcb1-3Galb1-4GlcNAcb1-3Galb1-4GlcNAcb1-2Mana1-6(GlcNAcb1-3Galb1-4GlcNAcb1-3Galb1-4GlcNAcb1-3Galb1-4GlcNAcb1-2Mana1-3)Manb1-4GlcNAcb1-4(Fuca1-6)GlcNAcb-Sp24                                                                                           |
| 166 | Galb1-4GlcNAcb1-3Galb1-4Glc-Sp8                                                                                                                                                                                                                                            |
| 467 | Neu5Aca2-6Galb1-4GlcNAcb1-6(Neu5Aca2-6Galb1-4GlcNAcb1-2)Mana1-6(GlcNAcb1-4)(Neu5Aca2-6Galb1-4GlcNAcb1-4)(Neu5Aca2-6Galb1-4GlcNAcb1-2)Mana1-3)Manb1-4GlcNAcb1-4GlcNAcb-Sp21                                                                                                 |
| 302 | Neu5Aca2-6Galb1-4GlcNAcb1-2Mana1-6(Galb1-4GlcNAcb1-2Mana1-3)Manb1-4GlcNAcb1-4GlcNAcb-Sp12                                                                                                                                                                                  |
| 365 | Galb1-4GlcNAcb1-2Mana1-6(Mana1-3)Manb1-4GlcNAcb1-4GlcNAcb-Sp12                                                                                                                                                                                                             |
| 137 | Neu5Aca2-6(Galb1-3)GalNAca-Sp14                                                                                                                                                                                                                                            |
| 192 | GlcNAcb1-4GlcNAcb1-4GlcNAcb-Sp8                                                                                                                                                                                                                                            |
| 441 | Galb1-6Galb-Sp10                                                                                                                                                                                                                                                           |
| 449 | Galb1-4GlcNAcb1-2Mana-Sp0                                                                                                                                                                                                                                                  |
| 569 | Galb1-4GlcNAcb1-3Galb1-4GlcNAcb1-3Galb1-4GlcNAcb1-3Galb1-4GlcNAcb1-3Galb1-4GlcNAcb1-3Galb1-4GlcNAcb1-3Galb1-4GlcNAcb1-2Mana1-6(Galb1-4GlcNAcb1-3Galb1-4GlcNAcb1-3Galb1-4GlcNAcb1-3Galb1-4GlcNAcb1-3Galb1-4GlcNAcb1-3Galb1-4GlcNAcb1-2Mana1-3)Manb1-4GlcNAcb1-4GlcNAcb-Sp25 |
| 25  | (3S)Galb1-4Glc-Sp8                                                                                                                                                                                                                                                         |
| 325 | Galb1-3GlcNAcb1-2Mana1-6(Galb1-3GlcNAcb1-2Mana1-3)Manb1-4GlcNAcb1-4GlcNAcb-Sp19                                                                                                                                                                                            |
| 215 | Mana1-2Mana1-2Mana1-6(Mana1-3)Mana-Sp9                                                                                                                                                                                                                                     |
| 1   | Gala-Sp8                                                                                                                                                                                                                                                                   |
| 19  | Galb1-4GlcNAcb1-6(Galb1-4GlcNAcb1-3)GalNAca-Sp8                                                                                                                                                                                                                            |
| 611 | Galb1-3GalNAcb1-4(Neu5Aca2-8Neu5Aca2-8Neu5Aca2-3)Galb1-4Glc-Sp21                                                                                                                                                                                                           |
| 161 | Galb1-4GlcNAcb1-3GalNAcb-Sp14                                                                                                                                                                                                                                              |
| 167 | Galb1-4GlcNAcb1-6(Galb1-3)GalNAca-Sp8                                                                                                                                                                                                                                      |
| 155 | Galb1-4(Fuca1-3)GlcNAcb1-3Galb1-4(Fuca1-3)GlcNAcb1-3Galb1-4(Fuca1-3)GlcNAcb-Sp0                                                                                                                                                                                            |
| 30  | (3S)Galb1-3GlcNAcb-Sp0                                                                                                                                                                                                                                                     |
| 216 | Mana1-6(Mana1-3)Mana1-6(Mana1-2Mana1-3)Manb1-4GlcNAcb1-4GlcNAcb-Sp12                                                                                                                                                                                                       |
| 392 | Galb1-3GlcNAcb1-3GalNAca-Sp14                                                                                                                                                                                                                                              |
| 270 | Neu5Aca2-6Galb1-4GlcNAcb-Sp8                                                                                                                                                                                                                                               |
| 593 | Neu5Aca2-3Galb1-4GlcNAcb1-3Galb1-4GlcNAcb1-3GalNAca-Sp14                                                                                                                                                                                                                   |
| 224 | Neu5Aca2-3Galb1-3GalNAca-Sp8                                                                                                                                                                                                                                               |
| 272 | Neu5Aca2-6Galb1-4GlcNAcb1-3Galb1-4GlcNAcb-Sp0                                                                                                                                                                                                                              |
| 144 | Galb1-3GalNAcb1-3Gala1-4Galb1-4Glc-Sp0                                                                                                                                                                                                                                     |
| 565 | GlcNAcb1-3Galb1-4GlcNAcb1-3Galb1-4GlcNAcb1-3Galb1-4GlcNAcb1-3Galb1-4GlcNAcb1-2Mana1-6(GlcNAcb1-3Galb1-4GlcNAcb1-3Galb1-4GlcNAcb1-3Galb1-4GlcNAcb1-3Galb1-4GlcNAcb1-2Mana1-3)Manb1-4GlcNAcb1-4GlcNAcb-Sp25                                                                  |
| 346 | Neu5Aca2-6Galb1-4GlcNAcb1-2Mana1-6(Mana1-3)Manb1-4GlcNAcb1-4GlcNAcb-Sp12                                                                                                                                                                                                   |
| 466 | Neu5Aca2-6Galb1-4GlcNAcb1-6(Neu5Aca2-6Galb1-4GlcNAcb1-2)Mana1-6(GlcNAcb1-4)(Neu5Aca2-6Galb1-4GlcNAcb1-2)Mana1-3)Manb1-4GlcNAcb1-4GlcNAcb-Sp21                                                                                                                              |
| 14  | Manb-Sp8                                                                                                                                                                                                                                                                   |
| 605 | GlcNAcb1-6(Neu5Aca2-3Galb1-3)GalNAca-Sp14                                                                                                                                                                                                                                  |
| 595 | GlcNAcb1-3Galb1-4GlcNAcb1-6(Galb1-3)GalNAca-Sp14                                                                                                                                                                                                                           |
| 195 | GlcNAcb1-6Galb1-4GlcNAcb-Sp8                                                                                                                                                                                                                                               |
| 180 | GlcNAcb1-3GalNAca-Sp8                                                                                                                                                                                                                                                      |
| 193 | GlcNAcb1-6GalNAca-Sp8                                                                                                                                                                                                                                                      |

|     |                                                                                                                                                                                                                         |
|-----|-------------------------------------------------------------------------------------------------------------------------------------------------------------------------------------------------------------------------|
| 538 | Gala1-3(Fuca1-2)Galb1-3GalNAcb1-3Gala1-4Galb1-4Glc-Sp21                                                                                                                                                                 |
| 492 | Neu5Aca2-3Galb1-3GlcNAcb1-6GalNAca-Sp14                                                                                                                                                                                 |
| 490 | Gala1-3Galb1-3GlcNAcb1-6GalNAca-Sp14                                                                                                                                                                                    |
| 187 | GlcNAcb1-4-MDPLys                                                                                                                                                                                                       |
| 84  | GalNAca1-3(Fuca1-2)Galb1-4(Fuca1-3)GlcNAcb-Sp0                                                                                                                                                                          |
| 131 | Fuca1-4(Galb1-3)GlcNAcb-Sp8                                                                                                                                                                                             |
| 491 | Galb1-3(Fuca1-4)GlcNAcb1-6GalNAca-Sp14                                                                                                                                                                                  |
| 448 | Galb1-4(Fuca1-3)GlcNAcb1-6GalNAca-Sp14                                                                                                                                                                                  |
| 145 | Galb1-3GalNAcb1-4(Neu5Aca2-3)Galb1-4Glc-Sp0                                                                                                                                                                             |
| 247 | Neu5Aca2-3Galb1-3GalNAcb1-3Gala1-4Galb1-4Glc-Sp0                                                                                                                                                                        |
| 465 | Neu5Aca2-6Galb1-4GlcNAcb1-4Mana1-6(GlcNAcb1-4)(Neu5Aca2-6Galb1-4GlcNAcb1-4)(Neu5Aca2-6Galb1-4GlcNAcb1-2)Mana1-3)Manb1-4GlcNAcb1-4GlcNAcb-Sp21                                                                           |
| 163 | Galb1-4GlcNAcb1-3Galb1-4GlcNAcb1-3Galb1-4GlcNAcb-Sp0                                                                                                                                                                    |
| 450 | Fuca1-2Galb1-4GlcNAcb1-6(Fuca1-2Galb1-4GlcNAcb1-3)GalNAca-Sp14                                                                                                                                                          |
| 340 | GlcNAca1-4Galb1-4GlcNAcb-Sp0                                                                                                                                                                                            |
| 96  | GalNAcb1-3(Fuca1-2)Galb-Sp8                                                                                                                                                                                             |
| 18  | GlcN(Gc)b-Sp8                                                                                                                                                                                                           |
| 189 | GlcNAcb1-4Galb1-4GlcNAcb-Sp8                                                                                                                                                                                            |
| 355 | Galb1-3GlcNAcb1-2Mana1-6(Galb1-3GlcNAcb1-2Mana1-3)Manb1-4GlcNAcb1-4(Fuca1-6)GlcNAcb-Sp22                                                                                                                                |
| 212 | Mana1-2Mana1-6(Mana1-3)Mana1-6(Mana1-2Mana1-2Mana1-3)Manb1-4GlcNAcb1-4GlcNAcb-Sp12                                                                                                                                      |
| 318 | Neu5Aca2-3Galb1-4GlcNAcb1-6(Neu5Aca2-3Galb1-3)GalNAca-Sp14                                                                                                                                                              |
| 406 | Gala1-3Galb1-4GlcNAcb1-3GalNAca-Sp14                                                                                                                                                                                    |
| 65  | Fuca1-2Galb1-3GalNAcb1-4(Neu5Aca2-3)Galb1-4Glc-Sp9                                                                                                                                                                      |
| 453 | Neu5Aca2-8Neu5Aca2-3Galb1-3GalNAcb1-4(Neu5Aca2-8Neu5Aca2-3)Galb1-4Glc-Sp0                                                                                                                                               |
| 37  | (3S)Galb1-4GlcNAcb-Sp8                                                                                                                                                                                                  |
| 98  | GalNAcb1-4(Fuca1-3)GlcNAcb-Sp0                                                                                                                                                                                          |
| 563 | GalNAcb1-3GlcNAcb-Sp0                                                                                                                                                                                                   |
| 354 | Galb1-4GlcNAcb1-2Mana1-6(Galb1-4GlcNAcb1-2Mana1-3)Manb1-4GlcNAcb1-4(Fuca1-6)GlcNAcb-Sp22                                                                                                                                |
| 443 | GalNAcb1-6GalNAcb-Sp8                                                                                                                                                                                                   |
| 6   | Fuca-Sp8                                                                                                                                                                                                                |
| 487 | Neu5Aca2-3Galb1-3GlcNAcb1-2Mana1-6(GlcNAcb1-4)(Neu5Aca2-3Galb1-3GlcNAcb1-2Mana1-3)Manb1-4GlcNAcb1-4GlcNAcb-Sp21                                                                                                         |
| 240 | Neu5Aca2-3Galb1-3(Fuca1-4)GlcNAcb-Sp8                                                                                                                                                                                   |
| 165 | Galb1-4GlcNAcb1-3Galb1-4Glc-Sp0                                                                                                                                                                                         |
| 594 | GlcNAcb1-3Galb1-4GlcNAcb1-3GalNAca-Sp14                                                                                                                                                                                 |
| 74  | Fuca1-2Galb1-4GlcNAcb1-3Galb1-4GlcNAcb-Sp0                                                                                                                                                                              |
| 577 | GlcNAcb1-3Galb1-4GlcNAcb1-3Galb1-4GlcNAcb1-2Mana1-6(GlcNAcb1-3Galb1-4GlcNAcb1-3Galb1-4GlcNAcb1-2Mana1-3)Manb1-4GlcNAcb1-4(Fuca1-6)GlcNAcb-Sp24                                                                          |
| 352 | Mana1-6(Galb1-4GlcNAcb1-2Mana1-3)Manb1-4GlcNAcb1-4GlcNAcb-Sp12                                                                                                                                                          |
| 539 | Galb1-3GalNAcb1-3Gal-Sp21                                                                                                                                                                                               |
| 561 | Gala1-3Galb1-4GlcNAcb1-2Mana1-6(Gala1-3Galb1-4GlcNAcb1-2Mana1-3)Manb1-4GlcNAcb1-4GlcNAcb-Sp24                                                                                                                           |
| 303 | Galb1-4GlcNAcb1-6(Galb1-4GlcNAcb1-3)Galb1-4GlcNAcb-Sp0                                                                                                                                                                  |
| 142 | Galb1-3GalNAca-Sp16                                                                                                                                                                                                     |
| 261 | Neu5Aca2-3Galb1-4GlcNAcb-Sp8                                                                                                                                                                                            |
| 371 | GalNAca1-3(Fuca1-2)Galb1-4GlcNAcb1-2Mana1-6(GalNAca1-3(Fuca1-2)Galb1-4GlcNAcb1-2Mana1-3)Manb1-4GlcNAcb1-4GlcNAcb-Sp20                                                                                                   |
| 290 | Galb1-3GlcNAcb1-3Galb1-3GlcNAcb-Sp0                                                                                                                                                                                     |
| 361 | Fuca1-2Galb1-3GlcNAcb1-2Mana1-6(Fuca1-2Galb1-3GlcNAcb1-2Mana1-3)Manb1-4GlcNAcb1-4GlcNAcb-Sp20                                                                                                                           |
| 535 | Neu5Aca2-3Galb1-4(Fuca1-3)GlcNAcb1-2Mana-Sp0                                                                                                                                                                            |
| 397 | Neu5Aca2-3Galb1-3GlcNAcb1-2Mana1-6(Neu5Aca2-3Galb1-3GlcNAcb1-2Mana1-3)Manb1-4GlcNAcb1-4GlcNAcb-Sp19                                                                                                                     |
| 29  | (3S)Galb1-3GalNAca-Sp8                                                                                                                                                                                                  |
| 528 | Gala1-3Galb1-3GlcNAcb1-2Mana-Sp0                                                                                                                                                                                        |
| 238 | Neu5Aca2-3GalNAcb1-4GlcNAcb-Sp0                                                                                                                                                                                         |
| 320 | Galb1-4GlcNAcb1-2Mana1-6(Neu5Aca2-6Galb1-4GlcNAcb1-2Mana1-3)Manb1-4GlcNAcb1-4GlcNAcb-Sp12                                                                                                                               |
| 105 | Gala1-3(Fuca1-2)Galb1-4(Fuca1-3)GlcNAcb-Sp8                                                                                                                                                                             |
| 402 | Galb1-4(Fuca1-3)GlcNAcb1-3GalNAca-Sp14                                                                                                                                                                                  |
| 71  | Fuca1-2Galb1-4(Fuca1-3)GlcNAcb1-3Galb1-4(Fuca1-3)GlcNAcb1-3Galb1-4(Fuca1-3)GlcNAcb-Sp0                                                                                                                                  |
| 286 | Neu5Gca2-6GalNAca-Sp0                                                                                                                                                                                                   |
| 108 | Gala1-3(Fuca1-2)Galb-Sp8                                                                                                                                                                                                |
| 258 | Neu5Aca2-3Galb1-4(Fuca1-3)GlcNAcb1-3Galb1-4GlcNAcb-Sp8                                                                                                                                                                  |
| 442 | Neu5Aca2-3Galb1-4GlcNAcb1-3Galb-Sp8                                                                                                                                                                                     |
| 103 | Gala1-3(Fuca1-2)Galb1-3GlcNAcb-Sp8                                                                                                                                                                                      |
| 245 | Neu5Aca2-6(Neu5Aca2-3Galb1-3)GalNAca-Sp14                                                                                                                                                                               |
| 73  | Fuca1-2Galb1-4(Fuca1-3)GlcNAcb-Sp8                                                                                                                                                                                      |
| 472 | Neu5Aca2-3Galb1-4GlcNAcb1-6(Neu5Aca2-3Galb1-4GlcNAcb1-3)GalNAca-Sp14                                                                                                                                                    |
| 69  | Fuca1-2Galb1-3GlcNAcb-Sp8                                                                                                                                                                                               |
| 568 | Galb1-3GlcNAcb1-6(Galb1-3)GalNAca-Sp14                                                                                                                                                                                  |
| 92  | GalNAca1-3GalNAcb-Sp8                                                                                                                                                                                                   |
| 182 | GlcNAcb1-3Galb-Sp8                                                                                                                                                                                                      |
| 143 | Galb1-3GalNAcb-Sp8                                                                                                                                                                                                      |
| 566 | Galb1-4GlcNAcb1-3Galb1-4GlcNAcb1-3Galb1-4GlcNAcb1-3Galb1-4GlcNAcb1-3Galb1-4GlcNAcb1-2Mana1-6(Galb1-4GlcNAcb1-3Galb1-4GlcNAcb1-3Galb1-4GlcNAcb1-3Galb1-4GlcNAcb1-3Galb1-4GlcNAcb1-2Mana1-3)Manb1-4GlcNAcb1-4GlcNAcb-Sp25 |
| 32  | (3S)Galb1-4(Fuca1-3)GlcNAcb-Sp0                                                                                                                                                                                         |
| 452 | GalNAca1-3(Fuca1-2)Galb1-4GlcNAcb1-6(GalNAca1-3(Fuca1-2)Galb1-4GlcNAcb1-3)GalNAca-Sp14                                                                                                                                  |

|     |                                                                                                                                                                                                   |
|-----|---------------------------------------------------------------------------------------------------------------------------------------------------------------------------------------------------|
| 526 | Gala1-3(Fuca1-2)Galb1-3GlcNAcb1-6GalNAc-Sp14                                                                                                                                                      |
| 368 | Neu5Aca2-6GlcNAcb1-4GlcNAcb1-4GlcNAc-Sp21                                                                                                                                                         |
| 550 | GlcNAcb1-3Galb1-4GlcNAcb1-3Galb1-4GlcNAcb1-3Galb1-4GlcNAcb1-2Mana1-6(GlcNAcb1-3Galb1-4GlcNAcb1-3Galb1-4GlcNAcb1-3Galb1-4GlcNAcb1-2Mana1-3)Manb1-4GlcNAcb1-4GlcNAcb-Sp25                           |
| 394 | GalNAca1-3(Fuca1-2)Galb1-3GalNAca1-3(Fuca1-2)Galb1-4GlcNAcb-Sp0                                                                                                                                   |
| 551 | Galb1-4GlcNAcb1-3Galb1-4GlcNAcb1-3Galb1-4GlcNAcb1-3Galb1-4GlcNAcb1-2Mana1-6(Galb1-4GlcNAcb1-3Galb1-4GlcNAcb1-3Galb1-4GlcNAcb1-3Galb1-4GlcNAcb1-2Mana1-3)Manb1-4GlcNAcb1-4GlcNAcb-Sp25             |
| 104 | Gala1-3(Fuca1-2)Galb1-4(Fuca1-3)GlcNAcb-Sp0                                                                                                                                                       |
| 464 | Neu5Aca2-6Galb1-4GlcNAcb1-2Mana1-6(GlcNAcb1-4)(Neu5Aca2-6Galb1-4GlcNAcb1-2Mana1-3)Manb1-4GlcNAcb1-4GlcNAcb-Sp21                                                                                   |
| 358 | KDNa2-6Galb1-4GlcNAc-Sp0                                                                                                                                                                          |
| 200 | Glc1-6Glc1-Sp8                                                                                                                                                                                    |
| 556 | Neu5Gca2-8Neu5Gca2-3Galb1-4GlcNAcb1-3Galb1-4GlcNAc-Sp0                                                                                                                                            |
| 308 | GlcAb1-3GlcNAcb-Sp8                                                                                                                                                                               |
| 334 | Gala1-4Galb1-4GlcNAcb1-3Galb1-4Glc-Sp0                                                                                                                                                            |
| 15  | GalNAcb-Sp8                                                                                                                                                                                       |
| 426 | Gala1-3Galb1-3GlcNAcb1-3GalNAc-Sp14                                                                                                                                                               |
| 557 | Neu5Gca2-8Neu5Gca2-6Galb1-4GlcNAc-Sp0                                                                                                                                                             |
| 319 | Neu5Aca2-6Galb1-4GlcNAcb1-2Mana1-6(Neu5Aca2-3Galb1-4GlcNAcb1-2Mana1-3)Manb1-4GlcNAcb1-4GlcNAcb-Sp12                                                                                               |
| 432 | GlcNAcb1-2Mana1-6(GlcNAcb1-4)(GlcNAcb1-2Mana1-3)Manb1-4GlcNAcb1-4GlcNAc-Sp21                                                                                                                      |
| 578 | Galb1-4GlcNAcb1-3Galb1-4GlcNAcb1-3Galb1-4GlcNAcb1-2Mana1-6(Galb1-4GlcNAcb1-3Galb1-4GlcNAcb1-3Galb1-4GlcNAcb1-2Mana1-3)Manb1-4GlcNAcb1-4(Fuca1-6)GlcNAcb-Sp24                                      |
| 85  | (3S)Galb1-4(Fuca1-3)Glc-Sp0                                                                                                                                                                       |
| 262 | Neu5Aca2-3Galb1-4GlcNAcb1-3Galb1-4GlcNAcb-Sp0                                                                                                                                                     |
| 483 | Neu5Aca2-6Galb1-4GlcNAcb1-2Mana1-6(Neu5Aca2-6Galb1-4GlcNAcb1-2Mana1-3)Manb1-4GlcNAcb1-4(Fuca1-6)GlcNAcb-Sp24                                                                                      |
| 438 | Galb1-4GlcNAcb1-6(Galb1-4GlcNAcb1-2)Mana1-6(GlcNAcb1-4)(Galb1-4GlcNAcb1-2Mana1-3)Manb1-4GlcNAcb1-4GlcNAc-Sp21                                                                                     |
| 153 | Galb1-4(Fuca1-3)GlcNAcb-Sp8                                                                                                                                                                       |
| 64  | Fuca1-2Galb1-3GalNAcb1-4(Neu5Aca2-3)Galb1-4Glc-Sp0                                                                                                                                                |
| 547 | GlcNAcb1-3Galb1-4GlcNAcb1-3Galb1-4GlcNAcb1-2Mana1-6(GlcNAcb1-3Galb1-4GlcNAcb1-3Galb1-4GlcNAcb1-2Mana1-3)Manb1-4GlcNAcb1-4GlcNAcb-Sp25                                                             |
| 328 | Galb1-4(Fuca1-3)GlcNAcb1-2Mana1-6(Galb1-4(Fuca1-3)GlcNAcb1-2Mana1-3)Manb1-4GlcNAcb1-4GlcNAcb-Sp20                                                                                                 |
| 370 | Galb1-4GlcNAcb1-2Mana1-6(Galb1-4GlcNAcb1-4)(Galb1-4GlcNAcb1-2)Mana1-3)Manb1-4GlcNAcb1-4GlcNAc-Sp21                                                                                                |
| 271 | Neu5Aca2-6Galb1-4GlcNAcb1-3Galb1-4(Fuca1-3)GlcNAcb1-3Galb1-4(Fuca1-3)GlcNAcb-Sp0                                                                                                                  |
| 231 | Neu5Aca2-3(6S)Galb1-4(Fuca1-3)GlcNAcb-Sp8                                                                                                                                                         |
| 102 | Gala1-3(Fuca1-2)Galb1-3GlcNAcb-Sp0                                                                                                                                                                |
| 82  | Fucb1-3GlcNAcb-Sp8                                                                                                                                                                                |
| 186 | GlcNAcb1-3Galb1-4Glc-Sp0                                                                                                                                                                          |
| 284 | Neu5Gca2-3Galb1-4GlcNAcb-Sp0                                                                                                                                                                      |
| 549 | Galb1-4GlcNAcb1-3Galb1-4GlcNAcb1-3Galb1-4GlcNAcb1-2Mana1-6(Galb1-4GlcNAcb1-3Galb1-4GlcNAcb1-3Galb1-4GlcNAcb1-2Mana1-3)Manb1-4GlcNAcb1-4GlcNAcb-Sp24                                               |
| 120 | Gala1-4(Fuca1-2)Galb1-4GlcNAcb-Sp8                                                                                                                                                                |
| 221 | Fuca1-2(6S)Galb1-4GlcNAcb-Sp0                                                                                                                                                                     |
| 198 | Glc1-6Glc1-6Glc-Sp8                                                                                                                                                                               |
| 295 | Neu5Aca2-3Galb1-3GlcNAcb1-3Galb1-3GlcNAcb-Sp0                                                                                                                                                     |
| 214 | Mana1-6(Mana1-3)Mana-Sp9                                                                                                                                                                          |
| 425 | GalNAca1-3(Fuca1-2)Galb1-3GlcNAcb1-3GalNAc-Sp14                                                                                                                                                   |
| 181 | GlcNAcb1-3GalNAca-Sp14                                                                                                                                                                            |
| 558 | Neu5Aca2-8Neu5Aca2-3Galb1-4GlcNAc-Sp0                                                                                                                                                             |
| 147 | Galb1-3Galb-Sp8                                                                                                                                                                                   |
| 199 | Glc1-4Glc-Sp8                                                                                                                                                                                     |
| 336 | GalNAca1-3(Fuca1-2)Galb1-4GlcNAcb1-3Galb1-4GlcNAcb-Sp0                                                                                                                                            |
| 581 | GlcNAcb1-3Galb1-4GlcNAcb1-3Galb1-4GlcNAcb1-3Galb1-4GlcNAcb1-3Galb1-4GlcNAcb1-2Mana1-6(GlcNAcb1-3Galb1-4GlcNAcb1-3Galb1-4GlcNAcb1-3Galb1-4GlcNAcb1-2Mana1-3)Manb1-4GlcNAcb1-4(Fuca1-6)GlcNAcb-Sp19 |
| 139 | Neu5Aca2-6(Galb1-3)GlcNAcb1-4Galb1-4Glc-Sp10                                                                                                                                                      |
| 367 | Neu5Aca2-6GlcNAcb1-4GlcNAc-Sp21                                                                                                                                                                   |
| 414 | Gala1-3(Fuca1-2)Galb1-4GlcNAcb1-3GalNAca-Sp14                                                                                                                                                     |
| 17  | GlcNAcb-Sp8                                                                                                                                                                                       |
| 116 | Gala1-3Galb1-4GlcNAcb-Sp8                                                                                                                                                                         |
| 484 | Neu5Aca2-3Galb1-4GlcNAcb1-2Mana1-6(Neu5Aca2-3Galb1-4GlcNAcb1-2Mana1-3)Manb1-4GlcNAcb1-4(Fuca1-6)GlcNAcb-Sp24                                                                                      |
| 576 | Galb1-4GlcNAcb1-3Galb1-4GlcNAcb1-2Mana1-6(Galb1-4GlcNAcb1-3Galb1-4GlcNAcb1-2Mana1-3)Manb1-4GlcNAcb1-4(Fuca1-6)GlcNAcb-Sp24                                                                        |
| 494 | Galb1-4(Fuca1-3)GlcNAcb1-6(Neu5Aca2-6(Neu5Aca2-3Galb1-3)GlcNAcb1-3)Galb1-4Glc-Sp21                                                                                                                |
| 310 | GlcNAcb1-3Man-Sp10                                                                                                                                                                                |
| 446 | Fuca1-2Galb1-4 GlcNAcb1-2Mana1-6(Fuca1-2Galb1-4GlcNAcb1-2(Fuca1-2Galb1-4GlcNAcb1-4)Mana1-3)Manb1-4GlcNAcb1-4GlcNAcb-Sp12                                                                          |
| 234 | GalNAcb1-4(Neu5Aca2-3)Galb1-4Glc-Sp0                                                                                                                                                              |
| 233 | GalNAcb1-4(Neu5Aca2-3)Galb1-4GlcNAcb-Sp8                                                                                                                                                          |
| 296 | Neu5Aca2-3Galb1-4GlcNAcb1-3Galb1-3GlcNAcb-Sp0                                                                                                                                                     |
| 412 | Galb1-3GalNAcb1-4(Neu5Aca2-8Neu5Aca2-3)Galb1-4Glc-Sp0                                                                                                                                             |
| 70  | Fuca1-2Galb1-4(Fuca1-3)GlcNAcb1-3Galb1-4(Fuca1-3)GlcNAcb-Sp0                                                                                                                                      |
| 13  | Glc-Sp8                                                                                                                                                                                           |
| 57  | Neu5Aca2-6Galb1-4GlcNAcb1-2Mana1-6(Neu5Aca2-6Galb1-4GlcNAcb1-2Man-a1-3)Manb1-4GlcNAcb1-4GlcNAcb-Sp21                                                                                              |

|     |                                                                                                                                   |
|-----|-----------------------------------------------------------------------------------------------------------------------------------|
| 562 | GlcNAcb1-3Galb1-4GlcNAcb1-6(GlcNAcb1-3Galb1-3)GalNAca-Sp14                                                                        |
| 289 | Neu5Aca2-3Galb1-4GlcNAcb1-6(Galb1-3)GalNAca-Sp14                                                                                  |
| 312 | GlcNAcb1-4GlcNAcb-Sp12                                                                                                            |
| 179 | GlcNAcb1-6(GlcNAcb1-3)Galb1-4GlcNAcb-Sp8                                                                                          |
| 351 | Galb1-4GlcNAcb1-2Mana1-6Manb1-4GlcNAcb1-4GlcNAc-Sp12                                                                              |
| 266 | Neu5Aca2-6GalNAca-Sp8                                                                                                             |
| 244 | Neu5Aca2-6(Neu5Aca2-3Galb1-3)GalNAca-Sp8                                                                                          |
| 309 | Neu5Aca2-6Galb1-4GlcNAcb1-2Mana1-6(GlcNAcb1-2Mana1-3)Manb1-4GlcNAcb1-4GlcNAcb-Sp12                                                |
| 400 | Neu5Aca2-3Galb1-3GlcNAcb1-3GalNAca-Sp14                                                                                           |
| 330 | Neu5,9Ac2a2-3Galb1-3GlcNAcb-Sp0                                                                                                   |
| 63  | Fuca1-2Galb1-3GalNAca-Sp14                                                                                                        |
| 489 | Galb1-3GlcNAcb1-6GalNAca-Sp14                                                                                                     |
| 50  | Mana1-6(Mana1-3)Manb1-4GlcNAcb1-4GlcNAcb-Sp12                                                                                     |
| 485 | Mana1-6(Mana1-3)Manb1-4GlcNAcb1-4(Fuca1-6)GlcNAcb-Sp19                                                                            |
| 248 | Neu5Aca2-3Galb1-3GlcNAcb1-3Galb1-4GlcNAcb-Sp0                                                                                     |
| 54  | Galb1-4GlcNAcb1-2Mana1-6(Galb1-4GlcNAcb1-2Mana1-3)Manb1-4GlcNAcb1-4GlcNAcb-Sp12                                                   |
| 68  | Fuca1-2Galb1-3GlcNAcb-Sp0                                                                                                         |
| 456 | Gala1-3(Fuca1-2)Galb1-3GlcNAcb1-2Mana1-6(Gala1-3(Fuca1-2)Galb1-3GlcNAcb1-2Mana1-3)Manb1-4GlcNAcb1-4(Fuca1-6)GlcNAcb-Sp22          |
| 269 | Neu5Aca2-6Galb1-4GlcNAcb-Sp0                                                                                                      |
| 9   | Neu5Aca-Sp8                                                                                                                       |
| 486 | Galb1-4GlcNAcb1-6(Galb1-4GlcNAcb1-2)Mana1-6(Galb1-4GlcNAcb1-2Mana1-3)Manb1-4GlcNAcb1-4(Fuca1-6)GlcNAcb-Sp24                       |
| 80  | Fuca1-3GlcNAcb-Sp8                                                                                                                |
| 415 | GalNAca1-3(Fuca1-2)Galb1-4GlcNAcb1-3GalNAca-Sp14                                                                                  |
| 342 | GlcNAca1-4Galb1-4GlcNAcb1-3Galb1-4Glc-Sp0                                                                                         |
| 191 | GlcNAcb1-4GlcNAcb1-4GlcNAcb1-4GlcNAcb1-4GlcNAcb1-Sp8                                                                              |
| 86  | GalNAca1-3(Fuca1-2)Galb1-4GlcNAcb-Sp0                                                                                             |
| 488 | Neu5Aca2-6Galb1-4GlcNAcb1-6(Fuca1-2Galb1-4(Fuca1-3)GlcNAcb1-3)Galb1-4Glc-Sp21                                                     |
| 90  | GalNAca1-3(Fuca1-2)Galb-Sp8                                                                                                       |
| 3   | Mana-Sp8                                                                                                                          |
| 162 | Galb1-4GlcNAcb1-3Galb1-4(Fuca1-3)GlcNAcb1-3Galb1-4(Fuca1-3)GlcNAcb-Sp0                                                            |
| 350 | Galb1-4GlcNAcb1-2Mana1-3Manb1-4GlcNAcb1-4GlcNAc-Sp12                                                                              |
| 177 | GlcNAcb1-6(GlcNAcb1-3)GalNAca-Sp8                                                                                                 |
| 149 | Galb1-3GlcNAcb1-3Galb1-4Glc-Sp10                                                                                                  |
| 185 | GlcNAcb1-3Galb1-4GlcNAcb1-3Galb1-4GlcNAcb-Sp0                                                                                     |
| 60  | Fuca1-2Galb1-3GalNAcb1-3Gala1-4Galb1-4Glc-Sp9                                                                                     |
| 311 | GlcNAcb1-4GlcNAcb-Sp10                                                                                                            |
| 287 | Neu5Gca2-6Galb1-4GlcNAcb-Sp0                                                                                                      |
| 129 | Galb1-3(Fuca1-4)GlcNAc-Sp0                                                                                                        |
| 294 | Galb1-4GlcNAcb1-3Galb1-3GlcNAcb-Sp0                                                                                               |
| 97  | GalNAcb1-3Gala1-4Galb1-4GlcNAcb-Sp0                                                                                               |
| 498 | Fuca1-2(6S)Galb1-3GlcNAcb-Sp0                                                                                                     |
| 170 | Galb1-4GlcNAcb-Sp8                                                                                                                |
| 430 | Galb1-4GlcNAcb1-6(Fuca1-2Galb1-3GlcNAcb1-3)Galb1-4Glc-Sp21                                                                        |
| 107 | Gala1-3(Fuca1-2)Galb1-4Glc-Sp0                                                                                                    |
| 171 | Galb1-4GlcNAcb-Sp23                                                                                                               |
| 575 | GlcNAcb1-3Galb1-4GlcNAcb1-2Mana1-6(GlcNAcb1-3Galb1-4GlcNAcb1-2Mana1-3)Manb1-4GlcNAcb1-4(Fuca1-6)GlcNAcb-Sp24                      |
| 158 | Galb1-4GalNAca1-3(Fuca1-2)Galb1-4GlcNAcb-Sp8                                                                                      |
| 176 | GlcNAcb1-2Galb1-3GalNAca-Sp8                                                                                                      |
| 21  | GlcNAcb1-6(GlcNAcb1-4)(GlcNAcb1-3)GlcNAc-Sp8                                                                                      |
| 610 | GlcNAcb1-3Fuca-Sp21                                                                                                               |
| 2   | Glca-Sp8                                                                                                                          |
| 564 | GalNAcb1-4GlcNAcb1-3GalNAcb1-4GlcNAcb-Sp0                                                                                         |
| 79  | Fuca1-2Galb-Sp8                                                                                                                   |
| 282 | Neu5Gca2-3Galb1-3GlcNAcb-Sp0                                                                                                      |
| 267 | Neu5Aca2-6GalNAcb1-4GlcNAcb-Sp0                                                                                                   |
| 160 | Galb1-4GlcNAcb1-3GalNAca-Sp8                                                                                                      |
| 341 | GlcNAca1-4Galb1-3GlcNAcb-Sp0                                                                                                      |
| 429 | Galb1-3GlcNAcb1-6(Galb1-3GlcNAcb1-2)Mana1-6(Galb1-3GlcNAcb1-2Mana1-3)Manb1-4GlcNAcb1-4GlcNAcb-Sp19                                |
| 285 | Neu5Gca2-3Galb1-4Glc-Sp0                                                                                                          |
| 33  | (3S)Galb1-4(Fuca1-3)GlcNAc-Sp8                                                                                                    |
| 363 | Fuca1-2Galb1-4(Fuca1-3)GlcNAcb1-2Mana1-6(Fuca1-2Galb1-4(Fuca1-3)GlcNAcb1-2Mana1-3)Manb1-4GlcNAcb1-4GlcNAc-Sp20                    |
| 91  | GalNAca1-3(Fuca1-2)Galb-Sp18                                                                                                      |
| 188 | GlcNAcb1-6(GlcNAcb1-4)GalNAca-Sp8                                                                                                 |
| 439 | Galb1-4GlcNAcb1-6(Galb1-4GlcNAcb1-2)Mana1-6(GlcNAcb1-4)(Galb1-4GlcNAcb1-4)(Galb1-4GlcNAcb1-2)Mana1-3)Manb1-4GlcNAcb1-4GlcNAc-Sp21 |
| 16  | GlcNAcb-Sp0                                                                                                                       |
| 209 | Mana1-2Mana1-6(Mana1-2Mana1-3)Mana-Sp9                                                                                            |
| 83  | GalNAca1-3(Fuca1-2)Galb1-3GlcNAcb-Sp0                                                                                             |

|     |                                                                                                                                               |
|-----|-----------------------------------------------------------------------------------------------------------------------------------------------|
| 130 | Galb1-3(Fuca1-4)GlcNAc-Sp8                                                                                                                    |
| 197 | Glc1-4Glc-Sp8                                                                                                                                 |
| 329 | Neu5,9Ac2a2-3Galb1-4GlcNAcb-Sp0                                                                                                               |
| 66  | Fuca1-2Galb1-3GlcNAcb1-3Galb1-4Glc-Sp8                                                                                                        |
| 380 | GalNAcb1-4GlcNAcb1-2Mana1-6(GalNAcb1-4GlcNAcb1-2Mana1-3)Manb1-4GlcNAcb1-4GlcNAc-Sp12                                                          |
| 94  | GalNAca1-4(Fuca1-2)Galb1-4GlcNAcb-Sp8                                                                                                         |
| 135 | GlcNAcb1-6(Galb1-3)GalNAca-Sp14                                                                                                               |
| 280 | Neu5Ac2-6Galb1-4GlcNAcb-Sp8                                                                                                                   |
| 496 | Gala1-3Galb1-4GlcNAcb1-6GalNAca-Sp14                                                                                                          |
| 391 | Fuca1-2Galb1-3GalNAca1-3(Fuca1-2)Galb1-4GlcNAcb-Sp0                                                                                           |
| 416 | GalNAca1-3GalNAcb1-3Gala1-4Galb1-4Glc-Sp0                                                                                                     |
| 431 | Fuca1-3GlcNAcb1-6(Galb1-4GlcNAcb1-3)Galb1-4Glc-Sp21                                                                                           |
| 175 | GlcNAca1-6Galb1-4GlcNAcb-Sp8                                                                                                                  |
| 8   | Rhaa-Sp8                                                                                                                                      |
| 327 | Neu5Aca2-3Galb1-4GlcNAcb1-2Mana1-6(Neu5Aca2-6Galb1-4GlcNAcb1-2Mana1-3)Manb1-4GlcNAcb1-4GlcNAcb-Sp12                                           |
| 369 | Galb1-4(Fuca1-3)GlcNAcb1-6(Fuca1-2Galb1-4GlcNAcb1-3)Galb1-4Glc-Sp21                                                                           |
| 115 | Gala1-3Galb1-3GlcNAcb-Sp0                                                                                                                     |
| 408 | Galb1-3GlcNAca1-6Galb1-4GlcNAcb-Sp0                                                                                                           |
| 543 | Galb1-4GlcNAcb1-3Galb1-4GlcNAcb1-2Mana1-6(Galb1-4GlcNAcb1-3Galb1-4GlcNAcb1-2Mana1-3)Manb1-4GlcNAcb1-4GlcNAcb-Sp24                             |
| 507 | GalNAca1-3(Fuca1-2)Galb1-3GlcNAcb1-6GalNAca-Sp14                                                                                              |
| 437 | Galb1-4GlcNAcb1-2Mana1-6(GlcNAcb1-4)(Galb1-4GlcNAcb1-4)(Galb1-4GlcNAcb1-2)Mana1-3)Manb1-4GlcNAcb1-4GlcNAc-Sp21                                |
| 114 | Gala1-3Galb1-4(Fuca1-3)GlcNAcb-Sp8                                                                                                            |
| 537 | GalNAca1-3(Fuca1-2)Galb1-3GalNAcb1-3Gala1-4Galb1-4Glc-Sp21                                                                                    |
| 259 | Neu5Aca2-3Galb1-4GlcNAcb1-3Galb1-4GlcNAcb1-3Galb1-4GlcNAcb-Sp0                                                                                |
| 476 | GlcNAcb1-6(GlcNAcb1-2)Mana1-6(GlcNAcb1-2Mana1-3)Manb1-4GlcNAcb1-4(Fuca1-6)GlcNAcb-Sp24                                                        |
| 389 | GlcNAcb1-2Mana1-6(GlcNAcb1-4)(GlcNAcb1-2)Mana1-3)Manb1-4GlcNAcb1-4GlcNAc-Sp21                                                                 |
| 208 | Mana1-2Mana1-2Mana1-3Mana-Sp9                                                                                                                 |
| 390 | Fuca1-2Galb1-3GalNAca1-3(Fuca1-2)Galb1-4Glc-Sp0                                                                                               |
| 148 | Galb1-3GlcNAcb1-3Galb1-4GlcNAcb-Sp0                                                                                                           |
| 159 | Galb1-4GalNAcb1-3(Fuca1-2)Galb1-4GlcNAcb-Sp8                                                                                                  |
| 88  | GalNAca1-3(Fuca1-2)Galb1-4Glc-Sp0                                                                                                             |
| 364 | Gala1-3Galb1-4GlcNAcb1-2Mana1-6(Gala1-3Galb1-4GlcNAcb1-2Mana1-3)Manb1-4GlcNAcb1-4GlcNAcb-Sp20                                                 |
| 382 | Galb1-3GalNAca1-3(Fuca1-2)Galb1-4GlcNAc-Sp0                                                                                                   |
| 152 | Galb1-4(Fuca1-3)GlcNAcb-Sp0                                                                                                                   |
| 413 | Neu5Aca2-3Galb1-3GalNAcb1-4(Neu5Aca2-8Neu5Aca2-3)Galb1-4Glc-Sp0                                                                               |
| 164 | Galb1-4GlcNAcb1-3Galb1-4GlcNAcb-Sp0                                                                                                           |
| 373 | Gala1-3Galb1-4(Fuca1-3)GlcNAcb1-2Mana1-6(Gala1-3Galb1-4(Fuca1-3)GlcNAcb1-2Mana1-3)Manb1-4GlcNAcb1-4GlcNAcb-Sp20                               |
| 260 | Neu5Aca2-3Galb1-4GlcNAcb-Sp0                                                                                                                  |
| 333 | Neu5Aca2-6Galb1-4GlcNAcb1-3Galb1-4GlcNAcb1-3Galb1-4GlcNAcb-Sp0                                                                                |
| 552 | Galb1-3GlcNAcb1-3Galb1-4GlcNAcb1-2Mana1-6(Galb1-3GlcNAcb1-3Galb1-4GlcNAcb1-2Mana1-3)Manb1-4GlcNAcb1-4GlcNAc-Sp25                              |
| 89  | GlcNAcb1-3Galb1-3GalNAca-Sp8                                                                                                                  |
| 554 | Neu5Aca2-8Neu5Gca2-3Galb1-4GlcNAc-Sp0                                                                                                         |
| 140 | Galb1-3GalNAca-Sp8                                                                                                                            |
| 544 | Neu5Gca2-3Galb1-4GlcNAcb1-3Galb1-4GlcNAcb1-2Mana1-6(Neu5Gca2-3Galb1-4GlcNAcb1-3Galb1-4GlcNAcb1-2Mana1-3)Manb1-4GlcNAcb1-4GlcNAcb-Sp24         |
| 545 | Fuca1-2Galb1-4GlcNAcb1-3Galb1-4GlcNAcb1-2Mana1-6(Fuca1-2Galb1-4GlcNAcb1-3Galb1-4GlcNAcb1-2Mana1-3)Manb1-4GlcNAcb1-4GlcNAcb-Sp24               |
| 524 | GalNAca1-3(Fuca1-2)Galb1-4GlcNAcb1-2Mana-Sp0                                                                                                  |
| 461 | Neu5Aca2-3Galb1-4GlcNAcb1-4Mana1-6(GlcNAcb1-4)(Neu5Aca2-3Galb1-4GlcNAcb1-4)(Neu5Aca2-3Galb1-4GlcNAcb1-2)Mana1-3)Manb1-4GlcNAcb1-4GlcNAcb-Sp21 |
| 458 | GalNAca1-3(Fuca1-2)Galb1-3GlcNAcb1-2Mana1-6(GalNAca1-3(Fuca1-2)Galb1-3GlcNAcb1-2Mana1-3)Manb1-4GlcNAcb1-4(Fuca1-6)GlcNAcb-Sp22                |
| 455 | GalNAca1-3(Fuca1-2)Galb1-4GlcNAcb1-2Mana1-6(GalNAca1-3(Fuca1-2)Galb1-4GlcNAcb1-2Mana1-3)Manb1-4GlcNAcb1-4(Fuca1-6)GlcNAcb-Sp22                |
| 403 | GalNAca1-3GalNAcb1-3Gala1-4Galb1-4GlcNAcb-Sp0                                                                                                 |
| 424 | Gala1-3(Fuca1-2)Galb1-3GlcNAcb1-3GalNAc-Sp14                                                                                                  |
| 172 | Galb1-4Glc-Sp0                                                                                                                                |
| 87  | GalNAca1-3(Fuca1-2)Galb1-4GlcNAcb-Sp8                                                                                                         |



|     |                                                                                                                                                    |
|-----|----------------------------------------------------------------------------------------------------------------------------------------------------|
| 124 | Gala1-4GlcNAcb-Sp8                                                                                                                                 |
| 376 | Fuca1-4(Fuca1-2Galb1-3)GlcNAcb1-2Mana1-3(Fuca1-4(Fuca1-2Galb1-3)GlcNAcb1-2Mana1-3)Manb1-4GlcNAcb1-4GlcNAcb-Sp19                                    |
| 126 | Galb1-2Galb-Sp8                                                                                                                                    |
| 293 | Galb1-4(Fuca1-3)GlcNAcb1-3Galb1-3(Fuca1-4)GlcNAcb-Sp0                                                                                              |
| 447 | Fuca1-2Galb1-4(Fuca1-3)GlcNAcb1-2Mana1-6(Fuca1-2Galb1-4(Fuca1-3)GlcNAcb1-4(Fuca1-2Galb1-4(Fuca1-3)GlcNAcb1-2)Mana1-3)Manb1-4GlcNAcb1-4GlcNAcb-Sp12 |
| 459 | Galb1-4GlcNAcb1-6(Galb1-4GlcNAcb1-2)Mana1-6(Galb1-4GlcNAcb1-2Mana1-3)Manb1-4GlcNAcb1-4GlcNAcb-Sp19                                                 |
| 404 | Gala1-4Galb1-3GlcNAcb1-2Mana1-6(Gala1-4Galb1-3GlcNAcb1-2Mana1-3)Manb1-4GlcNAcb1-4GlcNAcb-Sp19                                                      |
| 525 | Galb1-3GlcNAcb1-2Mana-Sp0                                                                                                                          |
| 279 | Neu5Acb2-6GalNAca-Sp8                                                                                                                              |
| 106 | Gala1-3(Fuca1-2)Galb1-4GlcNAc-Sp0                                                                                                                  |
| 277 | Neu5Aca2-8Neu5Aca2-3Galb1-4Glc-Sp0                                                                                                                 |
| 138 | Neu5Acb2-6(Galb1-3)GalNAca-Sp8                                                                                                                     |
| 366 | Fuca1-4(Galb1-3)GlcNAcb1-2Mana1-6(Fuca1-4(Galb1-3)GlcNAcb1-2Mana1-3)Manb1-4GlcNAcb1-4(Fuca1-6)GlcNAcb-Sp22                                         |
| 381 | Galb1-3GalNAca1-3(Fuca1-2)Galb1-4Glc-Sp0                                                                                                           |
| 405 | Gala1-4Galb1-4GlcNAcb1-2Mana1-6(Gala1-4Galb1-4GlcNAcb1-2Mana1-3)Manb1-4GlcNAcb1-4GlcNAcb-Sp24                                                      |
| 113 | Gala1-3GalNAcb-Sp8                                                                                                                                 |
| 283 | Neu5Gca2-3Galb1-4(Fuca1-3)GlcNAcb-Sp0                                                                                                              |
| 305 | Galb1-4GlcNAca1-6Galb1-4GlcNAcb-Sp0                                                                                                                |
| 173 | Galb1-4Glc-Sp8                                                                                                                                     |
| 401 | Fuca1-2Galb1-4GlcNAcb1-3GalNAca-Sp14                                                                                                               |
| 317 | Mana1-2Mana1-6(Mana1-2Mana1-3)Mana1-6(Mana1-2Mana1-2Mana1-3)Mana-Sp9                                                                               |
| 254 | Neu5Aca2-3Galb1-4(Fuca1-3)GlcNAcb1-3Galb1-4(Fuca1-3)GlcNAcb1-3Galb1-4(Fuca1-3)GlcNAcb-Sp0                                                          |
| 519 | (6P)Galb1-4GlcNAcb-Sp0                                                                                                                             |
| 377 | Neu5Aca2-3Galb1-4GlcNAcb1-3GalNAc-Sp14                                                                                                             |
| 255 | Neu5Aca2-3Galb1-4(Fuca1-3)GlcNAcb-Sp0                                                                                                              |
| 383 | Galb1-3GlcNAcb1-3Galb1-4GlcNAcb1-6(Galb1-3GlcNAcb1-3)Galb1-4Glc-Sp0                                                                                |
| 307 | GalNAcb1-3Galb-Sp8                                                                                                                                 |
| 540 | GlcNAcb1-3Galb1-4GlcNAcb1-2Mana1-6(GlcNAcb1-3Galb1-4GlcNAcb1-2Mana1-3)Manb1-4GlcNAcb1-4GlcNAcb-Sp12                                                |
| 77  | Fuca1-2Galb1-4GlcNAcb-Sp8                                                                                                                          |
| 335 | GalNAcb1-3Gala1-4Galb1-4GlcNAcb1-3Galb1-4Glc-Sp0                                                                                                   |
| 49  | Neu5,9Ac2a2-6Galb1-4GlcNAcb-Sp8                                                                                                                    |
| 11  | Neu5Acb-Sp8                                                                                                                                        |
| 112 | Gala1-3GalNAca-Sp16                                                                                                                                |
| 553 | Neu5Gca2-8Neu5Gca2-3Galb1-4GlcNAc-Sp0                                                                                                              |
| 235 | Neu5Aca2-3Galb1-3GalNAcb1-4(Neu5Aca2-3)Galb1-4Glc-Sp0                                                                                              |
| 184 | GlcNAcb1-3Galb1-4GlcNAcb-Sp8                                                                                                                       |
| 433 | GlcNAcb1-2Mana1-6(GlcNAcb1-4)(GlcNAcb1-4(GlcNAcb1-2)Mana1-3)Manb1-4GlcNAcb1-4GlcNAc-Sp21                                                           |
| 117 | Gala1-3Galb1-4Glc-Sp0                                                                                                                              |
| 55  | Neu5Aca2-6Galb1-4GlcNAcb1-2Mana1-6(Neu5Aca2-6Galb1-4GlcNAcb1-2Mana1-3)Manb1-4GlcNAcb1-4GlcNAcb-Sp12                                                |
| 331 | Neu5Aca2-6Galb1-4GlcNAcb1-3Galb1-3GlcNAcb-Sp0                                                                                                      |
| 421 | Fuca1-2Galb1-4GlcNAcb1-2Mana1-6(Fuca1-2Galb1-4GlcNAcb1-2Mana1-3)Manb1-4GlcNAcb1-4(Fuca1-6)GlcNAcb-Sp22                                             |
| 362 | Fuca1-2Galb1-4GlcNAcb1-2Mana1-6(Fuca1-2Galb1-4GlcNAcb1-2Mana1-3)Manb1-4GlcNAcb1-4GlcNAcb-Sp20                                                      |
| 533 | Galb1-4GlcNAcb1-2 Mana1-6(Galb1-4GlcNAcb1-4)(Galb1-4GlcNAcb1-2Mana1-3)Manb1-4GlcNAcb1-4(Fuca1-6)GlcNAc-Sp21                                        |
| 409 | GalNAcb1-3Gala1-6Galb1-4Glc-Sp8                                                                                                                    |
| 434 | GlcNAcb1-6(GlcNAcb1-2)Mana1-6(GlcNAcb1-4)(GlcNAcb1-2Mana1-3)Manb1-4GlcNAcb1-4GlcNAc-Sp21                                                           |
| 407 | Galb1-3GlcNAcb1-6Galb1-4GlcNAcb-Sp0                                                                                                                |
| 183 | GlcNAcb1-3Galb1-4GlcNAcb-Sp0                                                                                                                       |
| 423 | Fuca1-2Galb1-3GlcNAcb1-3GalNAc-Sp14                                                                                                                |
| 53  | GlcNAcb1-2Mana1-6(GlcNAcb1-2Mana1-3)Manb1-4GlcNAcb1-4GlcNAcb-Sp13                                                                                  |
| 58  | Neu5Aca2-6Galb1-4GlcNAcb1-2Mana1-6(Neu5Aca2-6Galb1-4GlcNAcb1-2Mana1-3)Manb1-4GlcNAcb1-4GlcNAcb-Sp24                                                |
| 306 | Galb1-4GlcNAcb1-6Galb1-4GlcNAcb-Sp0                                                                                                                |
| 411 | Galb1-4GlcNAcb1-6(Neu5Aca2-6Galb1-3GlcNAcb1-3)Galb1-4Glc-Sp21                                                                                      |
| 257 | Neu5Aca2-3Galb1-4(Fuca1-3)GlcNAcb1-3Galb-Sp8                                                                                                       |
| 375 | Gala1-3(Fuca1-2)Galb1-3GlcNAcb1-2Mana1-6(Gala1-3(Fuca1-2)Galb1-3GlcNAcb1-2Mana1-3)Manb1-4GlcNAcb1-4GlcNAcb-Sp20                                    |
| 256 | Neu5Aca2-3Galb1-4(Fuca1-3)GlcNAcb-Sp8                                                                                                              |
| 174 | GlcNAca1-3Galb1-4GlcNAcb-Sp8                                                                                                                       |
| 78  | Fuca1-2Galb1-4Glc-Sp0                                                                                                                              |

|     |                                                                                                                                              |
|-----|----------------------------------------------------------------------------------------------------------------------------------------------|
| 523 | Gala1-3(Fuca1-2)Galb1-4GlcNAcb1-2Mana-Sp0                                                                                                    |
| 462 | Neu5Aca2-3Galb1-4GlcNAcb1-6(Neu5Aca2-3Galb1-4GlcNAcb1-2)Mana1-6(GlcNAcb1-4)(Neu5Aca2-3Galb1-4GlcNAcb1-2Mana1-3)Manb1-4GlcNAcb1-4GlcNAcb-Sp21 |
| 427 | Fuca1-2Galb1-3GlcNAcb1-2Mana1-6(Fuca1-2Galb1-3GlcNAcb1-2Mana1-3)Manb1-4GlcNAcb1-4(Fuca1-6)GlcNAcb-Sp22                                       |
| 387 | Galb1-3GlcNAcb1-3Galb1-4(Fuca1-3)GlcNAcb1-6(Galb1-3GlcNAcb1-3)Galb1-4Glc-Sp21                                                                |
| 128 | Galb1-3GlcNAcb1-3Galb1-4(Fuca1-3)GlcNAcb-Sp0                                                                                                 |
| 316 | Mana1-2Mana1-6(Mana1-3)Mana1-6(Mana1-2Mana1-3)Mana-Sp9                                                                                       |
| 127 | Galb1-3(Fuca1-4)GlcNAcb1-3Galb1-4(Fuca1-3)GlcNAcb-Sp0                                                                                        |
| 460 | Neu5Aca2-3Galb1-4GlcNAcb1-2Mana1-6(GlcNAcb1-4)(Neu5Aca2-3Galb1-4GlcNAcb1-2Mana1-3)Manb1-4GlcNAcb1-4GlcNAcb-Sp21                              |
| 385 | Galb1-4GlcNAcb1-6(Fuca1-4(Fuca1-2Galb1-3)GlcNAcb1-3)Galb1-4Glc-Sp21                                                                          |
| 52  | GlcNAcb1-2Mana1-6(GlcNAcb1-2Mana1-3)Manb1-4GlcNAcb1-4GlcNAcb-Sp12                                                                            |
| 384 | Galb1-4(Fuca1-3)GlcNAcb1-6(Galb1-3GlcNAcb1-3)Galb1-4Glc-Sp21                                                                                 |
| 536 | GlcNAcb1-3Galb1-4GlcNAcb1-6(GlcNAcb1-3)Galb1-4GlcNAcb-Sp0                                                                                    |
| 232 | GalNAcb1-4(Neu5Aca2-3)Galb1-4GlcNAcb-Sp0                                                                                                     |
| 4   | GalNAca-Sp8                                                                                                                                  |
| 422 | GlcNAcb1-2(GlcNAcb1-6)Mana1-6(GlcNAcb1-2Mana1-3)Manb1-4GlcNAcb1-4GlcNAcb-Sp19                                                                |
| 531 | GlcNAcb1-2 Mana1-6(GlcNAcb1-4)(GlcNAcb1-2Mana1-3)Manb1-4GlcNAcb1-4(Fuca1-6)GlcNAcb-Sp21                                                      |
| 428 | Gala1-3(Fuca1-2)Galb1-4GlcNAcb1-2Mana1-6(Gala1-3(Fuca1-2)Galb1-4GlcNAcb1-2Mana1-3)Manb1-4GlcNAcb1-4(Fuca1-6)GlcNAcb-Sp22                     |
| 374 | GalNAca1-3(Fuca1-2)Galb1-3GlcNAcb1-2Mana1-6(GalNAca1-3(Fuca1-2)Galb1-3GlcNAcb1-2Mana1-3)Manb1-4GlcNAcb1-4GlcNAcb-Sp20                        |
| 136 | Neu5Aca2-6(Galb1-3)GalNAca-Sp8                                                                                                               |
| 278 | Galb1-3(Fuca1-4)GlcNAcb1-3Galb1-3(Fuca1-4)GlcNAcb-Sp0                                                                                        |
| 304 | GlcNAcb1-6(Galb1-4GlcNAcb1-3)Galb1-4GlcNAcb-Sp0                                                                                              |
| 386 | Galb1-4(Fuca1-3)GlcNAcb1-6(Fuca1-4(Fuca1-2Galb1-3)GlcNAcb1-3)Galb1-4Glc-Sp21                                                                 |
| 457 | Neu5Aca2-6Galb1-4GlcNAcb1-6(Fuca1-2Galb1-3GlcNAcb1-3)Galb1-4Glc-Sp21                                                                         |
| 436 | Galb1-4GlcNAcb1-2Mana1-6(GlcNAcb1-4)(Galb1-4GlcNAcb1-2Mana1-3)Manb1-4GlcNAcb1-4GlcNAcb-Sp21                                                  |
| 62  | Fuca1-2Galb1-3GalNAca-Sp8                                                                                                                    |
| 339 | GlcNAca1-4Galb1-4GlcNAcb1-3Galb1-4GlcNAcb1-3Galb1-4GlcNAcb-Sp0                                                                               |
| 61  | Fuca1-2Galb1-3(Fuca1-4)GlcNAcb-Sp8                                                                                                           |
| 509 | Galb1-4GlcNAcb1-6(Galb1-4GlcNAcb1-2)Mana1-6(GlcNAcb1-4)Galb1-4GlcNAcb1-4(Galb1-4GlcNAcb1-2)Mana1-3)Manb1-4GlcNAcb1-4(Fuca1-6)GlcNAcb-Sp21    |
| 532 | Galb1-4GlcNAcb1-2 Mana1-6(GlcNAcb1-4)(Galb1-4GlcNAcb1-2Mana1-3)Manb1-4GlcNAcb1-4(Fuca1-6)GlcNAcb-Sp21                                        |
| 520 | GalNAca1-3(Fuca1-2)Galb1-4GlcNAcb1-6GalNAcb-Sp14                                                                                             |
| 75  | Fuca1-2Galb1-4GlcNAcb1-3Galb1-4GlcNAcb1-3Galb1-4GlcNAcb-Sp0                                                                                  |
| 281 | Neu5Gca2-3Galb1-3(Fuca1-4)GlcNAcb-Sp0                                                                                                        |
| 51  | Mana1-6(Mana1-3)Manb1-4GlcNAcb1-4GlcNAcb-Sp13                                                                                                |
| 508 | GlcNAcb1-6(GlcNAcb1-2)Mana1-6(GlcNAcb1-4)(GlcNAcb1-4)(GlcNAcb1-2)Mana1-3)Manb1-4GlcNAcb1-4(Fuca1-6)GlcNAcb-Sp21                              |
| 76  | Fuca1-2Galb1-4GlcNAcb-Sp0                                                                                                                    |
| 510 | Galb1-3GlcNAca1-3Galb1-4GlcNAcb-Sp8                                                                                                          |
| 150 | Galb1-3GlcNAcb-Sp0                                                                                                                           |
| 410 | Gala1-3(Fuca1-2)Galb1-4(Fuca1-3)Glc-Sp21                                                                                                     |
| 151 | Galb1-3GlcNAcb-Sp8                                                                                                                           |
| 210 | Mana1-2Mana1-3Mana-Sp9                                                                                                                       |
| 435 | GlcNAcb1-6(GlcNAcb1-2)Mana1-6(GlcNAcb1-4)(GlcNAcb1-4)(GlcNAcb1-2)Mana1-3)Manb1-4GlcNAcb1-4GlcNAcb-Sp21                                       |
| 555 | Neu5Gca2-8Neu5Aca2-3Galb1-4GlcNAcb-Sp0                                                                                                       |
| 522 | Gala1-3Galb1-4GlcNAcb1-2Mana-Sp0                                                                                                             |
| 398 | GlcNAcb1-2Mana1-6(Galb1-4GlcNAcb1-2Mana1-3)Manb1-4GlcNAcb1-4GlcNAcb-Sp12                                                                     |

|     |                                                                                                                       |
|-----|-----------------------------------------------------------------------------------------------------------------------|
| 388 | Galb1-4GlcNAcb1-6(Galb1-4GlcNAcb1-2)Mana1-6(Galb1-4GlcNAcb1-4(Galb1-4GlcNAcb1-2)Mana1-3)Manb1-4GlcNAcb1-4GlcNAcb-Sp21 |
| 56  | Neu5Aca2-6Galb1-4GlcNAcb1-2Mana1-6(Neu5Aca2-6Galb1-4GlcNAcb1-2Mana1-3)Manb1-4GlcNAcb1-4GlcNAcb-Sp13                   |

CrataBL (20ug/ml) Slide#15205 rRequest#2547 Alexa488 3/6/2012 YL

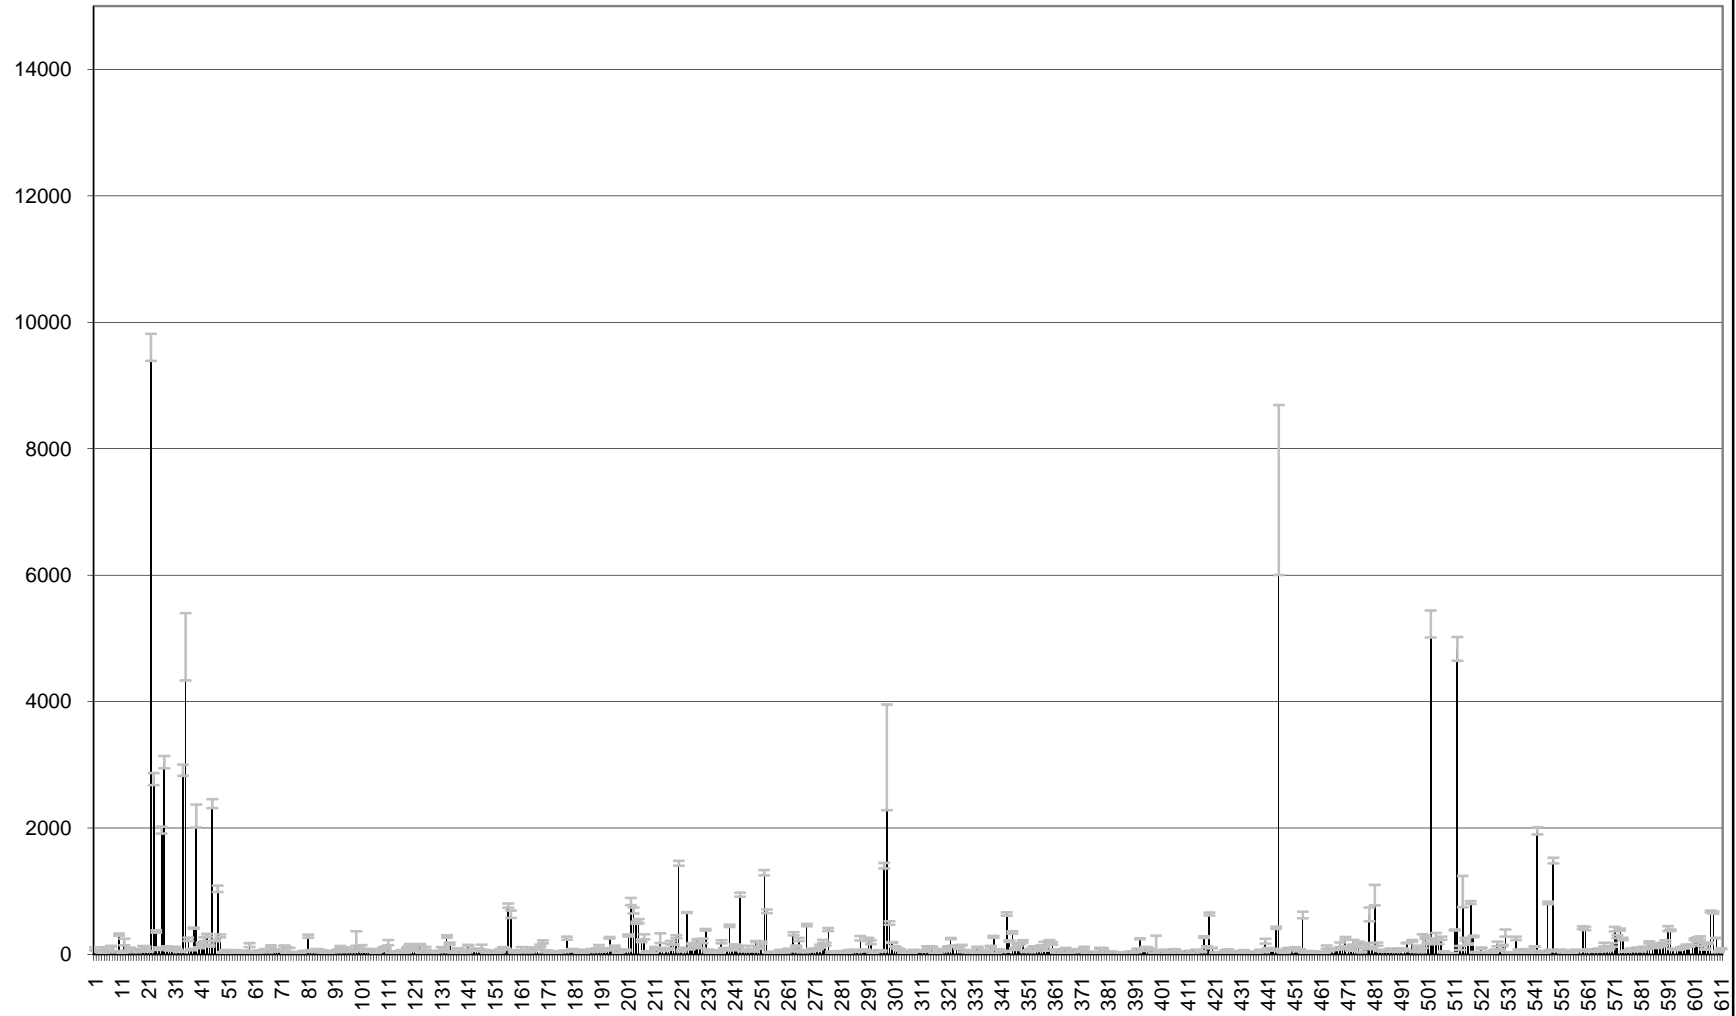

Supplement: NIHMS456439-supplement-1_si_001.pdf [file NIHMS456439-supplement-1_si_001.pdf]
